# Supplementary material
Source: PubMed Central journal article supplement (PMC4875428)

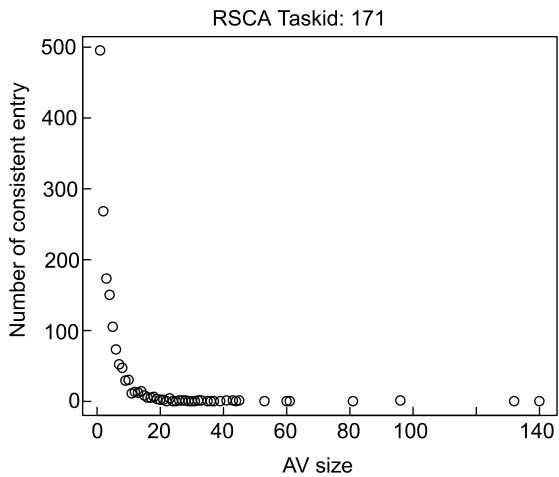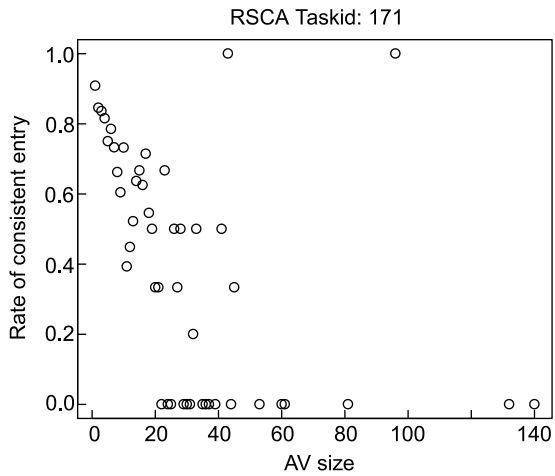

Supplementary data 1

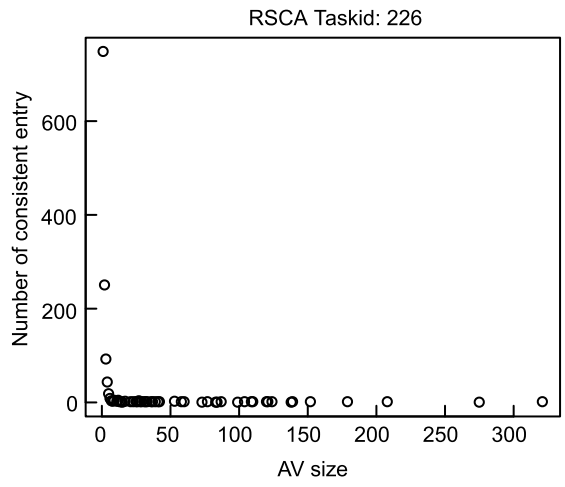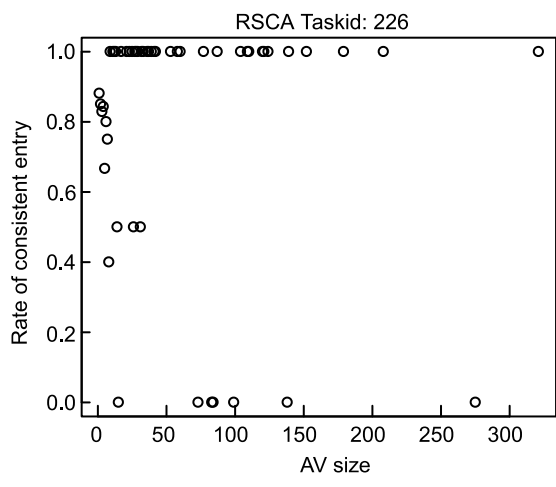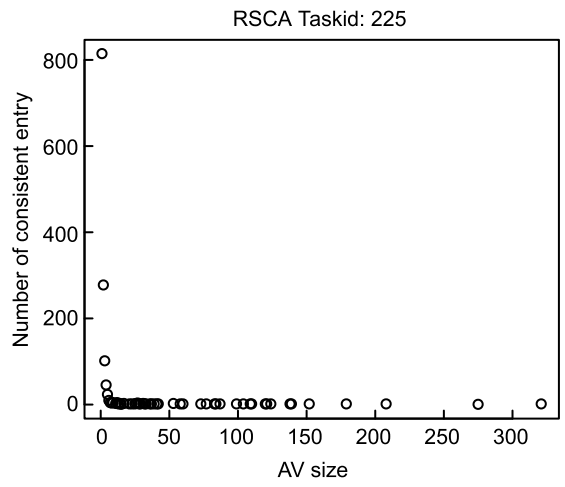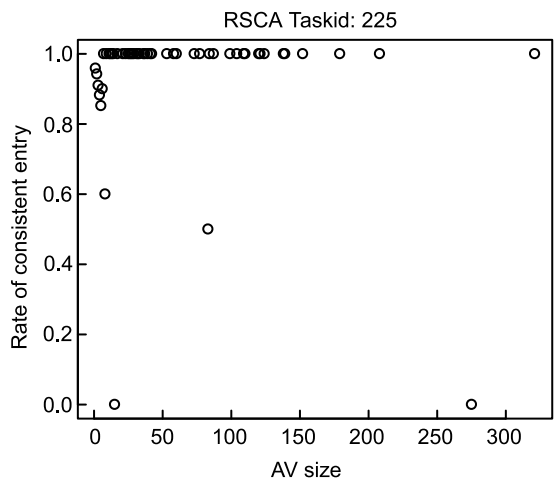

Supplementary data 2

Supplement: 13238_2012_2037_MOESM1_ESM.pdf [file 13238_2012_2037_MOESM1_ESM.pdf]
